# Supplementary material for: DABCO-functionalized silica–copper(i) complex: a novel and recyclable heterogeneous nanocatalyst for palladium-free Sonogashira cross-coupling reactions
Source: Royal Society of Chemistry journal article supplement (doi:10.1039/c6nj00612d), 2016-01-01
Supplement: c6nj00612d1.pdf [file c6nj00612d1.pdf]

# Supporting information

## **DABCO-functionalized silica-copper (I) complex: a novel and recyclable heterogeneous nanocatalyst for palladium-free Sonogashira cross-coupling reaction**

Abdol Reza Hajipour,<sup>a,b</sup> \* Seyed Mostafa Hosseini,<sup>a</sup> and Fatemeh Mohammadsaleh<sup>a</sup>

<sup>a</sup>Pharmaceutical Research Laboratory, Department of Chemistry, Isfahan University of Technology, Isfahan 84156, Islamic Republic of Iran.

<sup>b</sup> Department of Pharmacology, University of Wisconsin, Medical School, 1300 University Avenue, Madison, 53706-1532 WI, USA

\*Corresponding author. Tel: +98-313-391-3262; Fax: +98-313-391-2351

E-mail address: haji@cc.iut.ac.ir, arhajipour@wisc.edu

## Data for the prepared organic compounds<sup>1-4</sup>

### 1-Nitro-4-phenylethynyl-benzene

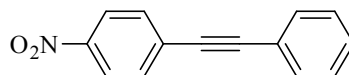

Yellow solid, melting point: 117-119 °C

<sup>1</sup>H-NMR (400 MHz, CDCl<sub>3</sub>, ppm, TMS): δ = 8.1 (d, J = 9.0 Hz, 2H), 7.8 (d, J = 8.8 Hz, 2H), 7.5 (m, 2H), 7.3 (m, 3H), <sup>13</sup>C-NMR (100 MHz, CDCl<sub>3</sub>): δ = 145.0, 130.2, 128.7, 127.1, 126.3, 124.6, 122.8, 120.2, 93.7, 86.3. FT-IR (KBr, cm<sup>-1</sup>): ν = 3106, 2215, 1580, 1340, 1115.

### 1-Nitro-3-phenylethynyl-benzene

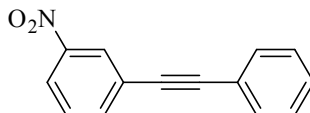

Pale yellow solid, melting point: 68-70 °C

<sup>1</sup>H-NMR (400 MHz, CDCl<sub>3</sub>, ppm, TMS): δ = 8.29 (m, 1H), 7.8 (ddd, J = 8.0, 2.1, 1.2 Hz, 1H), 7.65 (ddd, J = 14.3, 7.6, 3.0 Hz, 3H), 7.48-7.52 (m, 1H), 7.33-7.34 (m, 3H). <sup>13</sup>C-NMR (100 MHz, CDCl<sub>3</sub>): δ = 149.3, 136.3, 132.9, 127.5, 126.1, 125.5, 124.3, 123.1, 121.6, 120.2, 89.8, 87.8. FT-IR (KBr, cm<sup>-1</sup>): ν = 2920, 2209, 1589, 1503, 1337, 840.

### 1,2-diphenylethyne

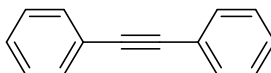

White solid, melting point: 58-60 °C

$^1\text{H-NMR}$  (400 MHz,  $\text{CDCl}_3$ , ppm, TMS):  $\delta = 7.55\text{-}7.60$  (m, 4H),  $7.27\text{-}7.39$  (m, 6H).  $^{13}\text{C-NMR}$  (100 MHz,  $\text{CDCl}_3$ ):  $\delta = 132.6, 129.4, 127.3, 122.3, 88.5$ .

### 1-(4-Phenylethynyl-phenyl)-ethanone

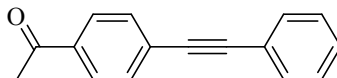

Pale yellow solid, melting point: 98-100 °C

$^1\text{H-NMR}$  (300 MHz, DMSO, ppm, TMS):  $\delta = 7.9$  (d,  $J = 8.5$  Hz, 2H),  $7.6$  (d,  $J = 8.5$  Hz, 2H),  $7.5$  (m, 2H),  $7.3$  (m, 3H),  $2.7$  (s, 3H).  $^{13}\text{C-NMR}$  (100 MHz,  $\text{CDCl}_3$ ):  $\delta = 198, 138.2, 133.6, 130.6, 127.5, 125.2, 124.1, 120.6, 94.7, 86.6, 25.6$ . FT-IR (KBr,  $\text{cm}^{-1}$ ):  $\nu = 3075, 2926, 2219, 1680, 1612, 1450, 1423, 1273, 1169$ .

### 1-Methoxy-4-phenylethynyl-benzene

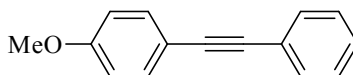

White solid, melting point: 60-62 °C

$^1\text{H-NMR}$  (400 MHz,  $\text{CDCl}_3$ , ppm, TMS):  $\delta = 7.56$  (m, 2H),  $7.46$  (d,  $J = 9.5$  Hz, 2H),  $7.30$  (m, 3H),  $6.89$  (d,  $J = 8.7$  Hz, 2H),  $3.87$  (s, 3H).  $^{13}\text{C-NMR}$  (100 MHz,  $\text{CDCl}_3$ ):  $\delta = 156.5, 135.7, 130.5, 128.3, 126.6, 125.2, 114.9, 112.5, 88.6, 86.2, 50.7$ .

### 4-(Phenylethynyl)benzonitrile

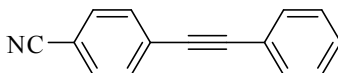

Pale yellow solid, melting point: 108–110 °C.

$^1\text{H-NMR}$ :  $\delta$  7.35–7.38 (m, 3H), 7.48–7.53 (m, 2H), 7.55–7.57 (m, 4H);  $^{13}\text{C-NMR}$ :  $\delta$  = 133, 134.7, 131.7, 127.8, 126, 124.9, 122.9, 119.3, 113.6, 95.2, 85.7.

1. L. Djakovitch and P. Rollet, *Adv. Synth. Catal.* 2004, **346**, 1782-1792.
2. F. Yang, X. Cui, Y. Li, J. Zang, G. Ren and Y. Wu, *Tetrahedron*. 2007, **63**, 1963-1969.
3. A. Elangovan, Y.-H. Wang and T.-I. Ho, *Org. Lett.* 2003, **5**, 1841-1844.
4. F. Monnier, F. Turtaut, L. Duroure and M. Taillefer, *Org. Lett.* 2008, **10**, 3203-3206.
